# Supplementary material
Source: HighWire-hosted journal article supplement (https://bmjopen.bmj.com/content/12/4/e055543)
Supplement: inline-supplementary-material-3 [file inline-supplementary-material-3.pdf]

**ADD LOCAL HOSPITAL HEADER****INFORMED CONSENT FORM for RANDOMISATION**

Full Title of Project: **Perinatal and 2 year neurodevelopmental outcome in late preterm fetal compromise: the TRUFFLE 2 Randomised Trial**

Chief Investigator: **Professor Christoph Lees**

Participant number:

***This consent form is for patients who are ELIGIBLE FOR RANDOMISATION. This means they have a small baby (EFW or AC <10<sup>th</sup> or fallen 50 centiles) AND an abnormal UCR (repeated to confirm abnormality within 2-24 hours).***

**Part A**

1. I confirm that I have read and understand the patient information sheet dated ... / ... / ... Version .... for the above trial. I have had the opportunity to ask questions and have had these answered satisfactorily.

2. I understand that my participation is voluntary and I am free to withdraw at any time, without giving any reason and without my medical care or legal rights being affected.

3. I understand that sections of any of my and my baby's medical notes may be looked at by responsible individuals from Imperial College London, from the NHS Trust or from regulatory authorities where it is relevant to my taking part in this research.

4. I give permission for these individuals to access my and my baby's records that are relevant to this research.

5. I understand that my family doctor will be informed of my participation in the trial.

6. **Optional:** I give consent for information collected about me and my baby to be used to support other ethically approved research in the future, including those outside of the EEA.

7. **Optional:** I consent to being contacted to potentially taking part in other research studies.

**Part B**

8. I consent to be randomised to either immediate or delayed delivery for this trial.

Please  
initial box

\_\_\_\_\_  
Name of Subject

\_\_\_\_\_  
Signature

\_\_\_\_\_  
Date

\_\_\_\_\_  
Name of Person taking consent

\_\_\_\_\_  
Signature

\_\_\_\_\_  
Date

\_\_\_\_\_  
Principal Investigator

\_\_\_\_\_  
Signature

\_\_\_\_\_  
Date

1 copy for subject; 1 copy for Principal Investigator; 1 copy to be kept with hospital notes
