# Supplementary material
Source: HighWire-hosted journal article supplement (https://bmjopen.bmj.com/content/12/4/e055543)
Supplement: inline-supplementary-material-5 [file inline-supplementary-material-5.pdf]

## Survey 'GB\_InfantHealthSurvey'

### GB\_InfantHealthSurvey - InfantGrowth

| Number | Question                                                                                                                                                                                                                   | Answers                                                                     |
|--------|----------------------------------------------------------------------------------------------------------------------------------------------------------------------------------------------------------------------------|-----------------------------------------------------------------------------|
|        | <b>**Could you enter below the last weight and height of your child and the date when it was measured. Please use the measurements from your last visit to a child health clinic, or take the measurements yourself.**</b> |                                                                             |
| 1.1    | Date of measurement                                                                                                                                                                                                        | <input type="text"/> <input type="text"/> <input type="text"/> (dd-mm-yyyy) |
| 1.2    | Height (cm)                                                                                                                                                                                                                | <input type="text"/> cm                                                     |
| 1.3    | Weight (Kg)                                                                                                                                                                                                                | <input type="text"/> kg                                                     |

### GB\_InfantHealthSurvey - InfantInpatientCare

| Number | Question                                                                                                                                                                    | Answers                                                                                                                                                                                                                                                                                                                                                                                        |
|--------|-----------------------------------------------------------------------------------------------------------------------------------------------------------------------------|------------------------------------------------------------------------------------------------------------------------------------------------------------------------------------------------------------------------------------------------------------------------------------------------------------------------------------------------------------------------------------------------|
|        | <b>**The following questions ask about your child's use of hospital services for the LAST SIX MONTHS only. Please answer all questions as accurately as possible.**</b>     |                                                                                                                                                                                                                                                                                                                                                                                                |
| 2.1    | Has your child been admitted to hospital in the last six months?                                                                                                            | <input type="radio"/> Yes <input checked="" type="radio"/> No                                                                                                                                                                                                                                                                                                                                  |
| 2.1.1  | <i>If 'Has your child been admitted to hospital in the last six months?' is equal to 'Yes' answer this question:</i><br>In which month was your child admitted in hospital? | <input type="radio"/> January<br><input type="radio"/> February<br><input type="radio"/> March<br><input type="radio"/> April<br><input type="radio"/> May<br><input type="radio"/> June<br><input type="radio"/> July<br><input type="radio"/> August<br><input type="radio"/> September<br><input type="radio"/> October<br><input type="radio"/> November<br><input type="radio"/> December |

|                                  |                                                                                                                                                                            |                                                                                                                                                                                                                |
|----------------------------------|----------------------------------------------------------------------------------------------------------------------------------------------------------------------------|----------------------------------------------------------------------------------------------------------------------------------------------------------------------------------------------------------------|
| 2.1.2                            | <b>If 'Has your child been admitted to hospital in the last six months?' is equal to 'Yes' answer this question:</b><br>In which year was your child admitted in hospital? | <input type="radio"/> 2020<br><input type="radio"/> 2021<br><input type="radio"/> 2022<br><input type="radio"/> 2023<br><input type="radio"/> 2024<br><input type="radio"/> 2025<br><input type="radio"/> 2026 |
| 2.1.3                            | <b>If 'Has your child been admitted to hospital in the last six months?' is equal to 'Yes' answer this question:</b><br>Was the admission planned or an emergency          | <input type="radio"/> Planned<br><input type="radio"/> Emergency                                                                                                                                               |
| 2.1.4                            | <b>If 'Has your child been admitted to hospital in the last six months?' is equal to 'Yes' answer this question:</b><br>What was the reason for the admission?             | <input type="text"/>                                                                                                                                                                                           |
| 2.1.5                            | <b>If 'Has your child been admitted to hospital in the last six months?' is equal to 'Yes' answer this question:</b><br>Did your child stay overnight in the hospital?     | <input type="radio"/> Yes <input type="radio"/> No                                                                                                                                                             |
| 2.1.5.1                          | <b>If 'Did your child stay overnight in the hospital?' is equal to 'Yes' answer this question:</b><br>For how many nights did your child stay in hospital?                 | <input type="text"/>                                                                                                                                                                                           |
| 2.1.6                            | <b>If 'Has your child been admitted to hospital in the last six months?' is equal to 'Yes' answer this question:</b><br>Did your child receive intensive care?             | <input type="radio"/> Yes <input type="radio"/> No                                                                                                                                                             |
| 2.1.6.1                          | <b>If 'Did your child receive intensive care?' is equal to 'Yes' answer this question:</b><br>For how many nights did your child stay in the intensive care?               | <input type="text"/>                                                                                                                                                                                           |
| 2.2                              | Check Admission                                                                                                                                                            |                                                                                                                                                                                                                |
| 2.2.1                            | <b>If 'Check Admission' is equal to '1' answer this question:</b><br>Has your child been admitted to hospital for a second time in the last six months?                    | <input type="radio"/> Yes <input type="radio"/> No                                                                                                                                                             |
| **-----_SECOND ADMISSION_-----** |                                                                                                                                                                            |                                                                                                                                                                                                                |

## GB\_InfantHealthSurvey - InfantOutpatientCare

| Number  | Question                                                                                                                                                                                                                          | Answers                                                                                                                                                                                                                                                                                                                                    |
|---------|-----------------------------------------------------------------------------------------------------------------------------------------------------------------------------------------------------------------------------------|--------------------------------------------------------------------------------------------------------------------------------------------------------------------------------------------------------------------------------------------------------------------------------------------------------------------------------------------|
|         | <b>**The following questions ask if your child attended a hospital outpatient department/clinic for the LAST SIX MONTHS only. Please answer all questions as accurately as possible.**</b>                                        |                                                                                                                                                                                                                                                                                                                                            |
| 3.1     | Has your child attended a hospital outpatient department/clinic in the last six months                                                                                                                                            | <input type="radio"/> Yes <input checked="" type="radio"/> No                                                                                                                                                                                                                                                                              |
| 3.1.1   | <i>If 'Has your child attended a hospital outpatient department/clinic in the last six months' is equal to 'Yes' answer this question:</i><br>Which type of clinic did your child visit during the last six months?               | <input type="radio"/> Accident or Emergency<br><input type="radio"/> Paediatric / Neonatal Follow-up<br><input type="radio"/> Orthopaedic<br><input type="radio"/> Audiology / Hearing<br><input type="radio"/> Eye / Vision<br><input type="radio"/> General Medicine<br><input type="radio"/> Dermatology<br><input type="radio"/> Other |
| 3.1.1.1 | <i>If 'Which type of clinic did your child visit during the last six months?' is equal to 'Other' answer this question:</i><br>Which specialty of outpatient department / clinic did your child visit during the last six months? | <input type="text"/>                                                                                                                                                                                                                                                                                                                       |
| 3.1.2   | <i>If 'Has your child attended a hospital outpatient department/clinic in the last six months' is equal to 'Yes' answer this question:</i><br>What was the reason for this visit?                                                 | <input type="text"/>                                                                                                                                                                                                                                                                                                                       |
| 3.1.3   | <i>If 'Has your child attended a hospital outpatient department/clinic in the last six months' is equal to 'Yes' answer this question:</i><br>How many times did your child visit this clinic during the past half year?          | <input type="text"/>                                                                                                                                                                                                                                                                                                                       |
| 3.2     | CheckOPD                                                                                                                                                                                                                          |                                                                                                                                                                                                                                                                                                                                            |
| 3.2.1   | <i>If 'CheckOPD' is equal to '1' answer this question:</i><br>Has your child attended a second hospital outpatient department/clinic in the last six months                                                                       | <input type="radio"/> Yes <input type="radio"/> No                                                                                                                                                                                                                                                                                         |
|         | <b>**-----_SECOND VISIT_-----**</b>                                                                                                                                                                                               |                                                                                                                                                                                                                                                                                                                                            |
