# Supplementary material
Source: HighWire-hosted journal article supplement (https://bmjopen.bmj.com/content/12/4/e055543)
Supplement: inline-supplementary-material-6 [file inline-supplementary-material-6.pdf]

## TRUFFLE 2

**Doppler Image Scoring****For Umbilical Artery:**

| PULSEWAVE IMAGE (/6) | 1 point                                                                                            | 0 point                                                                             |
|----------------------|----------------------------------------------------------------------------------------------------|-------------------------------------------------------------------------------------|
| Magnification        | Doppler display occupies 50% or more of the image                                                  | Doppler display occupies <50% of the image                                          |
| Angle of insonation  | <30 degrees                                                                                        | 30 degrees or more                                                                  |
| Sweep speed          | Doppler spectrum has 4-10 waveforms                                                                | Doppler spectrum has < 4 (3 or less) or > 10 waveforms (11 or more)                 |
| Sample gate          | Large enough to include 3/4th of the vessel diameter                                               | Smaller than 3/4th of the vessel diameter                                           |
| Appropriate PRF      | The waveform fits at least 75% of the pulse wave Doppler scale or PRF (pulse repetition frequency) | The waveform fits < 75% of the pulse wave Doppler scale or PRF                      |
| Image quality        | Uniform arterial waveforms, no aliasing or background artefacts or fetal breathing movements       | Variable arterial waveforms/aliasing/background artefacts/fetal breathing movements |

**For Middle Cerebral Arterial: (as above)**

| PULSEWAVE IMAGE (/6) | 1 point                                                                                      | 0 point                                                                             |
|----------------------|----------------------------------------------------------------------------------------------|-------------------------------------------------------------------------------------|
| Magnification        | Doppler display occupies 50% or more of the image                                            | Doppler display occupies <50% of the image                                          |
| Angle of insonation  | <30 degrees                                                                                  | 30 degrees or more                                                                  |
| Sweep speed          | Doppler spectrum has 4-10 waveforms                                                          | Doppler spectrum has < 4 (3 or less) or > 10 waveforms (11 or more)                 |
| Sample gate          | Large enough to include 3/4th of the vessel diameter                                         | Smaller than 3/4th of the vessel diameter                                           |
| Appropriate PRF      | The waveform fits at least 75% of the pulse wave Doppler scale or PRF                        | The waveform fits < 75% the pulse wave Doppler scale or PRF                         |
| Image quality        | Uniform arterial waveforms, no aliasing or background artefacts or fetal breathing movements | Variable arterial waveforms/aliasing/background artefacts/fetal breathing movements |
